# Supplementary material for: Alcohol consumption and the risk of postoperative mortality and morbidity after primary hip or knee arthroplasty – A register-based cohort study
Source: PubMed Central journal article supplement (PMC5357001; doi:10.1371/journal.pone.0173083), 2017-03-17

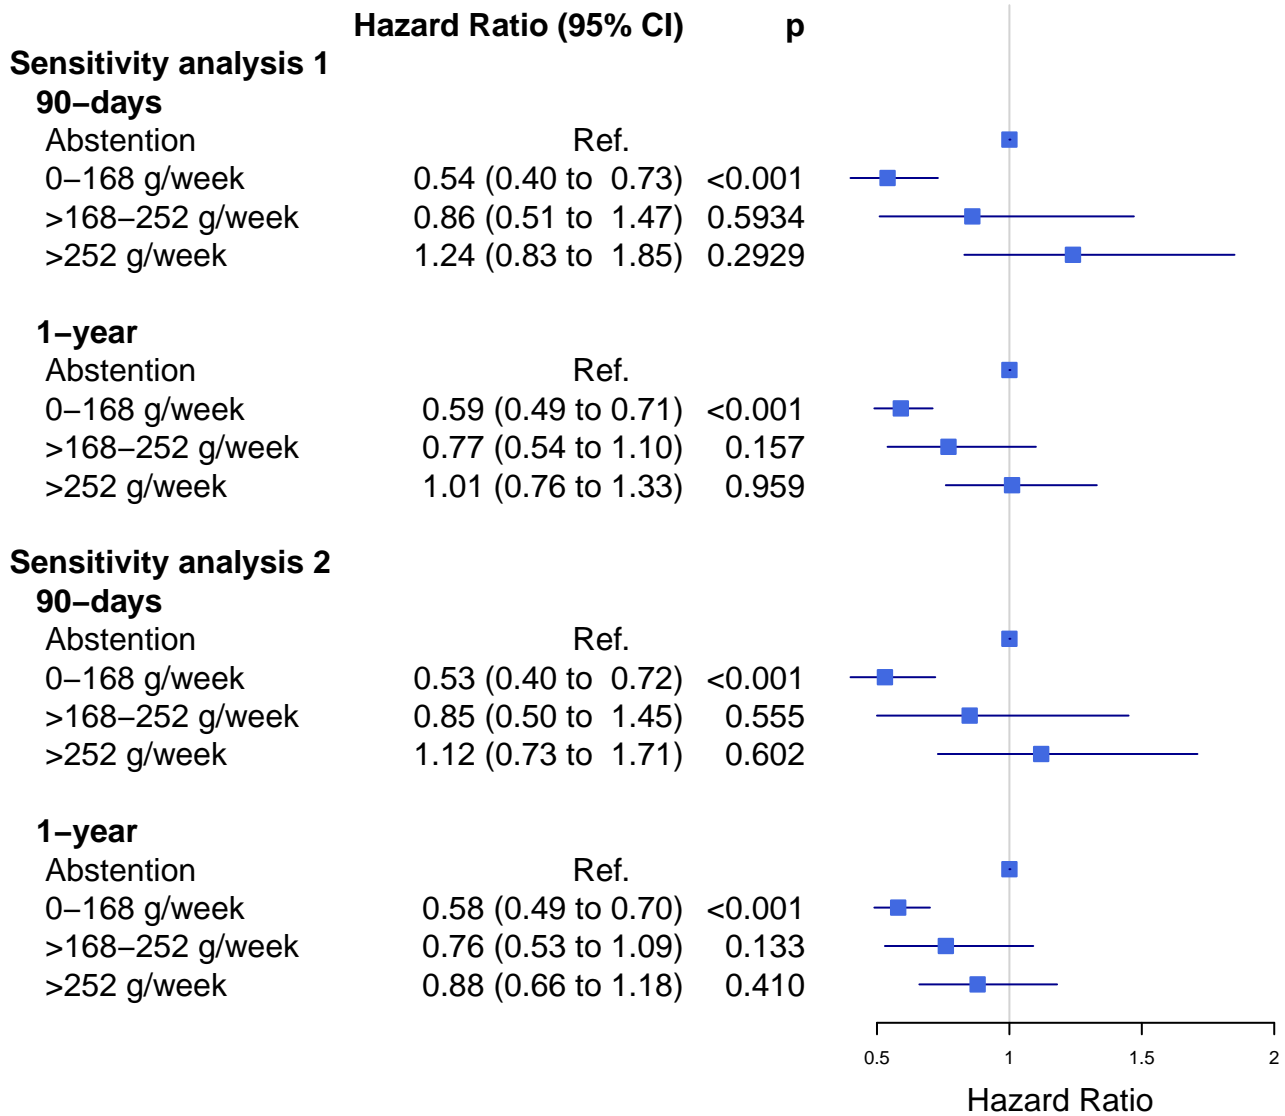

Supplement: pone.0173083.s003.pdf [file pone.0173083.s003.pdf]
